# Supplementary material for: Miniemulsion polymerization using carboxylated graphene quantum dots as surfactants: effects of monomer and initiator type
Source: Royal Society of Chemistry journal article supplement (doi:10.1039/d0py00925c), 2020-01-01
Supplement: d0py00925c1.pdf [file d0py00925c1.pdf]

## Supporting Information

# Miniemulsion Polymerization using Carboxylated Graphene Quantum Dots as Surfactants: Effects of Monomer and Initiator Type

Le N. M. Dinh,<sup>1</sup> Lakshmi N. Ramana,<sup>2</sup> Rhiannon P. Kuchel,<sup>3</sup> Vipul Agarwal,<sup>1\*</sup> Per B. Zetterlund<sup>1\*</sup>

<sup>1</sup>*Centre for Advanced Macromolecular Design (CAMD), School of Chemical Engineering, University of New South Wales, Sydney, NSW 2052, Australia*

<sup>2</sup>*Department of Materials Engineering, Indian Institute of Science, Bangalore, Karnataka 560012, India*

<sup>3</sup>*Mark Wainwright Analytical Centre, University of New South Wales, Sydney, NSW 2052, Australia.*

**Table S1.** Water solubility and density of monomers employed for miniemulsion polymerization.

| <b>Monomer</b> | <b>Chemical structure</b>                                                           | <b>Solubility in water</b>             | <b>Density at 25 °C<sup>1</sup> (g/mL)</b> |
|----------------|-------------------------------------------------------------------------------------|----------------------------------------|--------------------------------------------|
| St             | 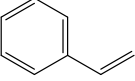   | 300 mg/L at 25°C <sup>1</sup>          | 0.906                                      |
| EA             |    | 20 g/L at 20°C                         | 0.918                                      |
| <i>n</i> BA    |    | 1.4 g/L at 20°C <sup>2</sup>           | 0.894                                      |
| <i>t</i> BA    |    | c.a. 2 g/L                             | 0.875                                      |
| BzMA           |    | 190 mg/L at 20°C <sup>3</sup>          | 1.04                                       |
| MMA            |   | 15.3 g/L at 20°C                       | 0.936                                      |
| HMA            |  | 39.97 mg/L at 25°C (est.) <sup>4</sup> | 0.863                                      |
| LMA            |  | 3 mg/L <sup>5</sup>                    | 0.868                                      |

Information obtained from supplier

**Table S2.** Conversion, PDI and zeta potential of the cGQDs/polymer nanocomposites after 24 h AIBN-initiated and VA-044-initiated miniemulsion polymerization using 7 wt.% cGQDs as sole surfactant.

| Monomer | Conversion (%) |        | PDI         |             | Zeta potential (mV) |            |
|---------|----------------|--------|-------------|-------------|---------------------|------------|
|         | AIBN           | VA-044 | AIBN        | VA-044      | AIBN                | VA-044     |
| St      | 62.0           | 88.1   | 0.10 ± 0.02 | 0.31 ± 0.07 | -38.9 ± 0.2         | 51.1 ± 0.3 |
| EA      | 16.3           | 58.9   | 0.04 ± 0.03 | 0.15 ± 0.04 | -42.1 ± 1.1         | 59.3 ± 0.7 |
| BA      | 10.4           | 81.8   | 0.43 ± 0.02 | 0.38 ± 0.04 | -46.8 ± 1.1         | 67.3 ± 2.0 |
| tBA     | 20.3           | 62.5   | 0.89 ± 0.18 | 0.10 ± 0.09 | -48.6 ± 1.5         | 54.8 ± 0.4 |
| BzMA    | 27.9           | 60.7   | 0.26 ± 0.04 | 0.87 ± 0.03 | -46.3 ± 0.8         | 61.8 ± 0.4 |
| MMA     | 53.2           | 69.2   | 0.79 ± 0.18 | 0.69 ± 0.12 | -26.6 ± 0.4         | 55.3 ± 2.8 |
| HMA     | 13.2           | 21.8   | 0.08 ± 0.03 | 0.85 ± 0.01 | -44.5 ± 1.1         | 56.2 ± 0.7 |
| LMA     | 43.4           | 9.7    | 0.26 ± 0.01 | 0.78 ± 0.19 | -44.9 ± 0.8         | 8.11 ± 1.0 |

**Table S3.** DLS average particle size in nanometres (nm) in terms of z-average, intensity, volume, and number after 24 h miniemulsion polymerization initiated by AIBN and VA-044.

| Monomer | Z-Average |        | Intensity |        | Number |        | Volume |        |
|---------|-----------|--------|-----------|--------|--------|--------|--------|--------|
|         | AIBN      | VA-044 | AIBN      | VA-044 | AIBN   | VA-044 | AIBN   | VA-044 |
| St      | 212       | 657    | 233       | 540    | 173    | 513    | 236    | 571    |
| EA      | 131       | 432    | 138       | 462    | 112    | 419    | 130    | 491    |
| BA      | 454       | 901    | 349       | 775    | 326    | 662    | 363    | 888    |
| tBA     | 1798      | 698    | 3508      | 728    | 365    | 697    | 3703   | 770    |
| BzMA    | 241       | 1705   | 345       | 548    | 144    | 548    | 382    | 555    |
| MMA     | 6046      | 1394   | 523       | 539    | 508    | 533    | 515    | 548    |
| HMA     | 193       | 1347   | 208       | 562    | 168    | 555    | 213    | 570    |
| LMA     | 164       | 879    | 152       | 2276   | 120    | 213    | 145    | 2584   |

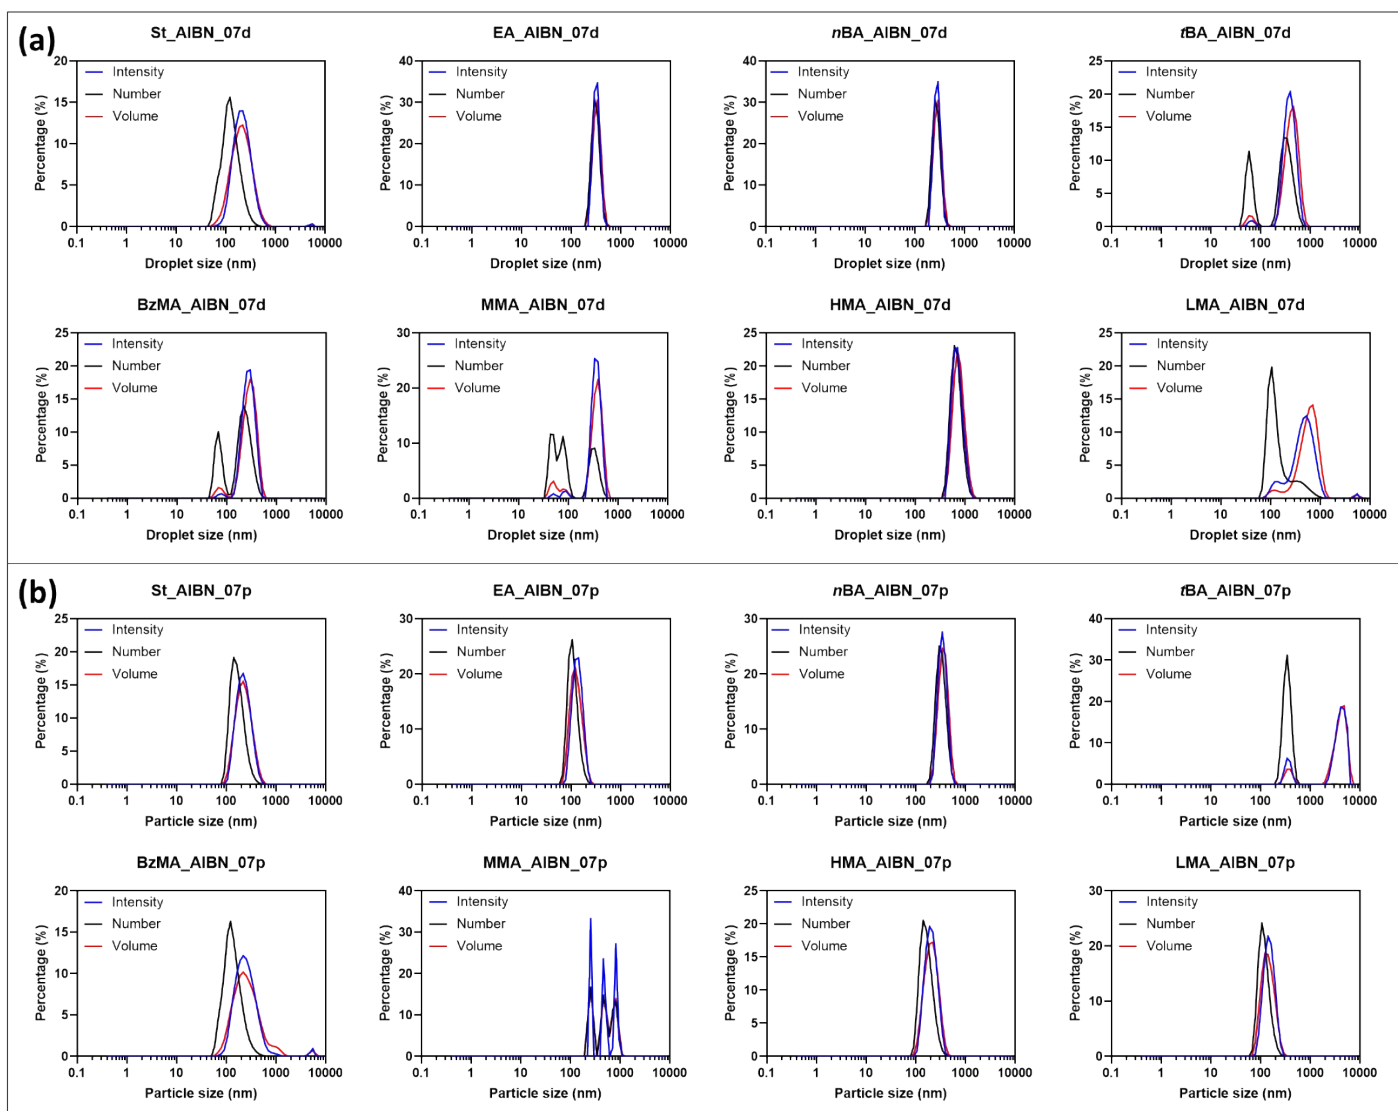

**Fig. S1.** DLS-generated (a) droplet size distribution after 10 min ultrasonication and (b) particle size distribution of miniemulsions after 24 h AIBN-initiated polymerization using 7 wt.% cGQDs relative to monomer as sole surfactant.

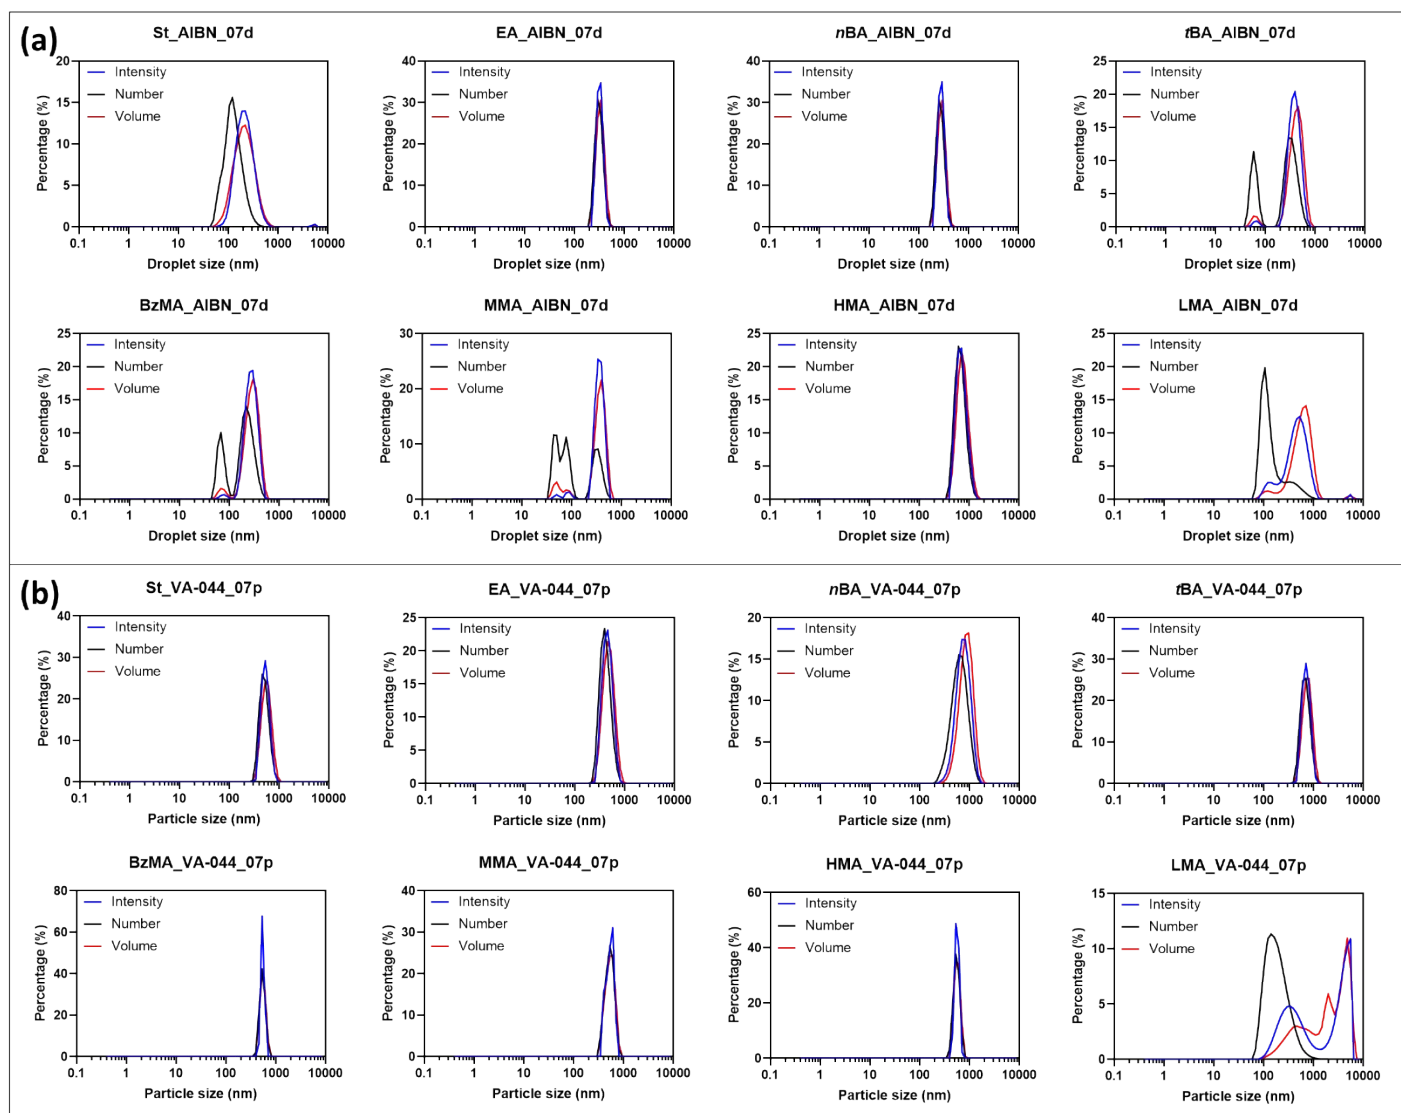

**Fig. S2.** DLS-generated (a) droplet size distribution after 10 min ultrasonication and (b) particle size distribution of miniemulsions after 24 h VA-044-initiated polymerization using 7 wt.% cGQDs relative to the monomer as sole surfactant.

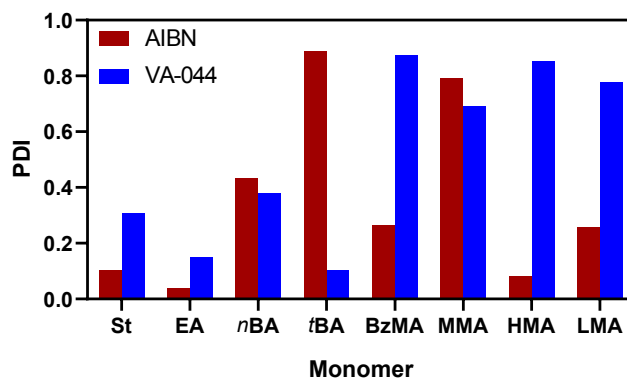

**Fig. S3.** Polydispersity index (PDI) after 24 h miniemulsion polymerization initiated by AIBN (red) and VA-044 (blue).

**The cumulative concentration of radicals** (*i.e.* total number of radicals generated from initiator decomposition as a function of time) generated from AIBN and VA-044 over 24 h of polymerization was calculated as follows:

$$[R]_{\text{gen}} = 2fI_0(1 - e^{-k_d t})$$

where:  $[R]_{\text{gen}}$  is the concentration of generated radicals (M)

$f$  is the initiator efficiency (an assumed value of 0.6 is used for both initiators)

$I_0$  is the initial concentration of initiator (0.25 M relative to organic phase)

$k_d$  is the decomposition rate of initiator ( $s^{-1}$ )

For AIBN,  $k_d = 4.47 \times 10^{15} \times e^{\frac{-131.7}{RT}}$  and for VA-044,  $k_d = 4.37 \times 10^{12} \times e^{\frac{-106.7}{RT}}$ . The values of activation energies and pre-exponential factors are obtained from Moad.<sup>6</sup> A cumulative radical concentration versus time plot was constructed below.

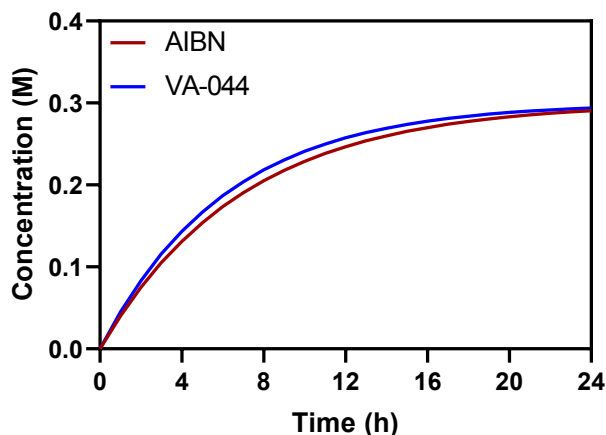

**Fig. S4.** Cumulative concentration of radicals generated from AIBN (blue, 70 °C) and VA-044 (red, 55 °C) over 24 h of polymerization. Note that these concentrations do not reflect actual radical concentrations in the system (which would be much lower) given that radical consumption is not accounted for – this is only to demonstrate that radical generation rates are similar.

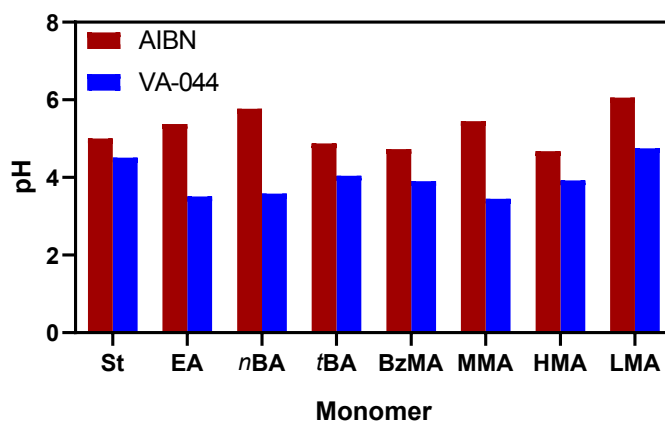

**Fig. S5.** pH values of each polymer after 24 h miniemulsion polymerization initiated by AIBN (red) and VA-044 (blue), measured using a pH meter.

## References

1. Samuel, H.; Yalkowsky, H.; Jain, P., Handbook of aqueous solubility data. CRC Press Boca Raton: 2010.
2. O'Neil, M. J., *The Merck index: an encyclopedia of chemicals, drugs, and biologicals*. RSC Publishing: 2013.
3. Industries, E. GPS Safety Summary – Benzyl methacrylate. <https://corporate.evonik.com/downloads/corporate/gps-summaries/gps-summary-benzyl-methacrylate.pdf> (accessed January 8).

4. EPA, U. Estimation Program Interface (EPI) Suite. <http://www.epa.gov/oppt/exposure/pubs/episuite.html> (accessed January 8).
5. Verschueren, K., *Handbook of environmental data on organic chemicals: Vol. 1*. John Wiley and Sons, Inc: 2001.
6. Moad, G., A Critical Assessment of the Kinetics and Mechanism of Initiation of Radical Polymerization with Commercially Available Dialkyldiazene Initiators. *Progress in Polymer Science* **2019**, 88, 130-188.
